1 Host range and genetic plasticity explain the co-existence of  
2 integrative and extrachromosomal mobile genetic elements

3 Jean Cury<sup>1,2</sup>, Pedro H. Oliveira<sup>1,2,\*</sup>, Fernando de la Cruz<sup>3</sup>, Eduardo P.C. Rocha<sup>1,2</sup>

4 Affiliations.

5 <sup>1</sup>Microbial Evolutionary Genomics, Institut Pasteur, 28, rue Dr Roux, Paris, 75015, France,

6 <sup>2</sup>CNRS, UMR3525, 28, rue Dr Roux, Paris, 75015, France,

7 <sup>3</sup> Instituto de Biomedicina y Biotecnología de Cantabria (IBBT),

8 Universidad de Cantabria, Calle Albert Einstein 22, 39011 Santander, Spain

9 \*Currently at: Department of Genetics and Genomic Sciences, Icahn School of Medicine at Mount  
10 Sinai, New York, New York, USA

11

12 **Classification:** Biological Sciences/Evolution

13 **Corresponding author:** Jean Cury ([jean.cury@normalesup.org](mailto:jean.cury@normalesup.org))

14

## 15 Abstract

16 Self-transmissible mobile genetic elements drive horizontal gene transfer between  
17 prokaryotes. Some of these elements integrate in the chromosome, whereas others  
18 replicate autonomously as plasmids. Recent works showed the existence of few differences,  
19 and occasional interconversion, between the two types of elements. Here, we enquired on  
20 why evolutionary processes have maintained the two types of mobile genetic elements by  
21 comparing integrative and conjugative elements (ICE) with extrachromosomal ones  
22 (conjugative plasmids) of the highly abundant MPF<sub>T</sub> conjugative type. Plasmids encode  
23 more replicases, partition systems, and antibiotic resistance genes, whereas ICEs encode  
24 more integrases and metabolism-associated genes. Plasmids are more variable in size, have  
25 more DNA repeats, and exchange genes more frequently. On the other hand, ICEs are more  
26 frequently transferred between distant taxa, and this drives the conversion of plasmids into  
27 ICEs after transfer to distantly related hosts. Hence, differential plasticity and  
28 transmissibility explain the occurrence of both integrative and extra-chromosomal elements  
29 in microbial populations.

30 **Keywords:** Mobile genetic elements, horizontal gene transfer, molecular evolution,  
31 microbial genomics, conjugation

## 32 Introduction

33 The genomes of Prokaryotes have mobile genetic elements (MGEs) integrated in the  
34 chromosome or replicating as extrachromosomal elements. These MGEs usually encode  
35 non-essential but ecologically important traits (1, 2). Extra-chromosomal elements, such as  
36 conjugative plasmids (CPs) and lytic phages, replicate autonomously in the cell using  
37 specialized replicases to recruit the bacterial DNA replication machinery (or to use their  
38 own). Plasmids and extra-chromosomal prophages can also increase their stability in cellular  
39 lineages using partition systems, for proper segregation during bacterial replication (3),  
40 resolution systems, to prevent accumulation of multimers (4), and restriction-modification  
41 or toxin-antitoxin systems, for post-segregation killing of their hosts (5). Alternatively, many  
42 MGEs integrate into the chromosome. This is the case of the vast majority of known  
43 prophages, of most conjugative elements (ICEs), and of many elements with poorly  
44 characterized mechanisms of genetic mobility (*e.g.*, many pathogenicity islands)(6–8). The  
45 integrated elements are replicated along with the host chromosome and require an  
46 additional step of excision before being transferred between cells. The existence of both  
47 integrative and extra-chromosomal elements was a fruitful source of controversy in the  
48 dawn of molecular biology, eventually leading to the discovery of the molecular  
49 mechanisms allowing both states (9, 10). Yet, a complementary question does not seem to  
50 have been addressed in the literature: Why are there both types of elements? What are the  
51 relative benefits and disadvantages of the integrated and extrachromosomal MGE?

52 To address these questions, we analyzed the differences and similarities between ICEs and  
53 CPs. We focused on these elements because both forms are frequently found in bacteria,  
54 they can be easily detected in genomes, and the mechanism of conjugation is well known.  
55 Conjugative elements have a crucial role in spreading antibiotic resistance and virulence  
56 genes among bacterial pathogens (11–14). Recently, several works suggested that the line  
57 separating integrative ICEs and CPs could be thinner than anticipated (15), because some  
58 ICEs encode plasmid-associated functions like replication (16) or partition (17), some  
59 plasmids encode integrases (18), and ICEs and CPs are intermingled in the phylogenetic tree  
60 of conjugative systems (19). Finally, both forms – ICEs and CPs – are found throughout the  
61 bacterial kingdom, but their relative frequency depends on the taxa and on the mechanisms

62 of conjugation (7). These differences suggest that conjugative elements endure diverse  
63 selective pressures for being integrative or extrachromosomal depending on unknown  
64 environmental, genetic, or physiological variables.

65 We thought that key differences in the biology of integrative and extrachromosomal  
66 elements might provide them with different types of advantages. ICEs require an additional  
67 step of integration/excision during transfer, which may take time and requires genetic  
68 regulation. Their integration in the chromosome may affect the latter's organization and  
69 structure, and these collateral effects might depend on the size of the element. On the  
70 other hand, ICEs replicate as part of chromosomes and could thus be lost from the cell at  
71 lower rates than plasmids. Furthermore, plasmids must recruit the host replication  
72 machinery, which may render elements incompatible and is known to constrain their host  
73 range: many plasmids are able to conjugate into distantly related hosts, but are unable to  
74 replicate there (20–22). We thus hypothesize that ICEs might be favored when transfers  
75 occur between distant hosts, whereas plasmids might provide more genetic plasticity  
76 because their size is not constrained by chromosomal organization.

77 Here, we study conjugative elements of the type  $MPP_{\tau}$ . This is the most frequent and best-  
78 studied type of conjugative systems (19), and the only one for which we can identify  
79 hundreds of elements of each of the forms (ICEs and CPs). We restricted our analysis to  
80 genera containing both CPs and ICEs, to avoid, as much as possible, taxonomical biases. We  
81 first describe the content of both types of elements and highlight their differences and  
82 similarities. Next, we quantify their genetic similarity and the extent of their gene  
83 exchanges. Finally, we show that chromosomal integration facilitates the colonization of  
84 novel taxa by a conjugative element.

85

86

## 87 Results

### 88 Functional and genetic differences between ICEs and CPs

89 We analyzed a set of 151 ICEs and 136 CPs of the same genera and of type MPF<sub>T</sub>, most of  
 90 which were from Proteobacteria (96.9%). Both ICEs and CPs were found to be AT-richer than  
 91 their host chromosomes, which is a common feature in MGEs and horizontally transferred  
 92 genes (23). However, the difference was three times smaller for ICEs (Fig. 1A), presumably  
 93 because they replicate with the chromosome or remain a longer time in the same host. The  
 94 average size of CPs is slightly larger (75kb vs 59kb), and the median slightly smaller (46kb vs  
 95 52kb) than that of ICEs. In contrast, CPs have more diverse sizes than ICEs (Fig. 1B), showing  
 96 a coefficient of variation twice as large (1.05 vs 0.49). The size of the conjugative elements  
 97 depends on the size of the bacterial genome (after discounting the size of their conjugative  
 98 elements), this effect being much stronger for CPs (Fig. 1C). CPs also have four times higher  
 99 density of large DNA repeats than ICEs (Fig. 1D). These results suggest that CPs diversify  
 100 faster than ICEs.

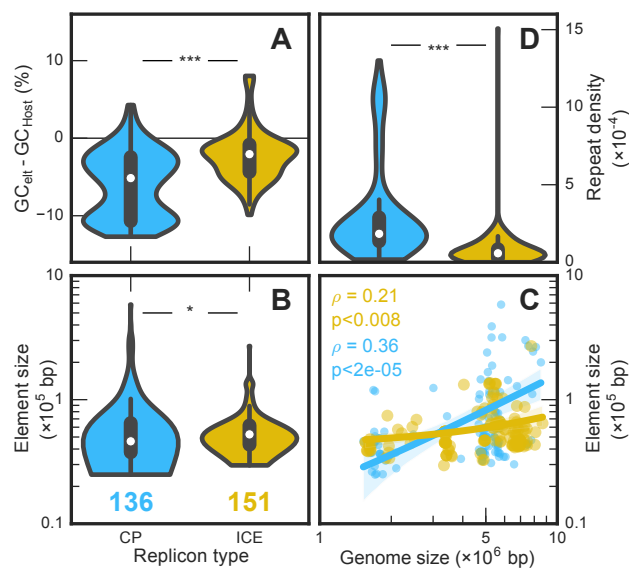

101

102 **Fig. 1:** Comparison between 136 CPs (blue) and 151 ICEs (yellow) in composition and sizes.  
 103 **A.** CPs are AT richer than ICEs relative to their hosts (Wilcoxon rank sum test,  $p$ -value  $< 10^{-3}$ ).  
 104 **B.** ICEs and CPs have different distributions of size (same test,  $p$ -value  $< 0.05$ ). Median sizes:  
 105 ICEs (52.5 kb) > CPs (46.1 kb). Averages: ICEs (59 kb) < CPs (74.6 kb) **C.** Size of the element  
 106 as a function of the genome size of its host (decreased by the size of the mobile element  
 107 itself). Shaded regions indicate the 95% confidence interval. The Y-axis is identical to the one

108 in panel B. **D.** Density of repeats is higher in CPs than in ICEs (0.30 vs 0.078 repeats per kb,  
109 same test, p-value <  $10^{-10}$ ).

110

111 HGT concentrates in a few hotspots in bacterial chromosomes, presumably to minimize  
112 disruption in their organization (24). We used HTg50, a measure of the concentration of  
113 HGT in chromosomes that corresponds to the minimal number of spots required to account  
114 for 50% of horizontally transferred genes (24), to test if chromosomes with fewer  
115 integration hotspots had more plasmids. Indeed, there is a negative association between  
116 the number of plasmids, weighted by their size, and the chromosomes' HTg50 (Spearman  
117  $\rho=-0.35$ , p-value=0.0016, Fig. S1).

118 We then quantified the differences between ICEs and CPs in terms of functions associated  
119 with their biology, with a focus on stabilization functions. Relaxases are part of the rolling  
120 circle replication initiator proteins and some have been shown to act as replicases(16, 25) or  
121 site-specific recombinases (26, 27). Since all conjugative elements encode a relaxase, by  
122 definition, they may also have these functions. In the following, we focused on typical  
123 plasmid replication initiator proteins (more than 95% of them are involved in theta-  
124 replication, and none is matched by the protein profiles of relaxases), and serine or tyrosine  
125 recombinases as integrases. Expectedly, ICEs showed higher frequency of integrases, while  
126 CPs had more frequently identifiable partition and replication systems. Some ICEs encode  
127 partition systems (11%) and many encode a replicase (40%), while 37% of CPs encode at  
128 least one tyrosine or serine recombinase (Fig. 2A). These results further illustrate a  
129 continuum between the two types of elements: about half of the elements (40% and 48%,  
130 ICEs and CPs, respectively) have functions usually associated with the other type and may  
131 (rarely) lack functions typically associated with its own type (Fig. 2B). We identified plasmid  
132 incompatibility systems of diverse types, whereas no ICE could not be typed in the current  
133 scheme (Fig. S2).

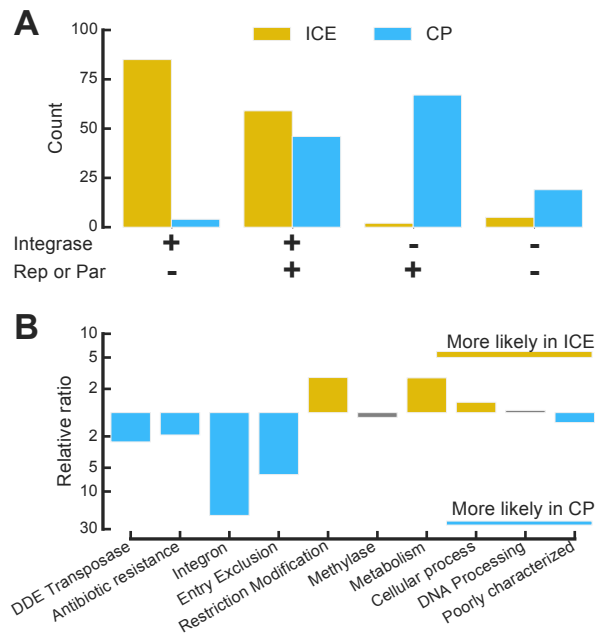

134

135 **Fig. 2:** Comparisons of the functions carried by ICEs and CPs. **A.** Elements encoding (+) or  
 136 lacking (-) replication or partition systems ("Rep or Par") or an integrase. **B.** Accessory  
 137 functions over-represented (yellow) or under-represented (blue) in ICEs relative to CPs.  
 138 Colored bars: significantly different from zero, p-value < 0.05 Fisher exact test with  
 139 Bonferroni-Holm correction for multiple tests. Grey bars otherwise.

140

141 We then made similar analyses for functions usually regarded as accessory or unrelated to  
 142 the biology of MGEs (Fig. 2B). ICEs were more likely to carry restriction-modification systems  
 143 (x2.8) than CPs (but not orphan methylases), suggesting that ICEs endure stronger selective  
 144 pressure for stabilization in the genome. In contrast, they were significantly less likely to  
 145 carry antibiotic resistance genes or integrons. They also had fewer identifiable entry-  
 146 exclusion systems, which may reflect the ability of ICEs to tolerate the presence of multiple  
 147 similar elements in the cell (28). The classification of genes in the four major functional  
 148 categories of the EggNOG database, showed that ICEs had relatively more genes encoding  
 149 metabolic and cellular processes. We have previously shown that genes of unknown or  
 150 poorly characterized function were over-represented in ICEs relative to their host  
 151 chromosome (29). The frequency of these genes is even higher in plasmids (61% vs 46%).  
 152 Hence, both types of elements have many functions in common, but their relative frequency  
 153 often differs significantly.

154 Genetic similarities between ICEs and CPs

155 The results of the previous section, together with previously published studies (see  
156 Introduction), suggest that ICEs and CPs either share a common history or often exchange  
157 genes (or both). We detailed the relationships of homology between ICEs and CPs using the  
158 weighted Gene Repertoire Relatedness (wGRR), which measures the frequency of bi-  
159 directional best hits between two elements weighted by their sequence similarity (see  
160 Methods). We clustered the matrix of wGRR using the Louvain algorithm (30), and found six  
161 well-distinguished groups (Fig. 3). Two groups (1 and 6) are only constituted of CPs, two are  
162 composed of more than 90% of ICEs (3 and 5) and two have a mix of both types of elements  
163 (2 and 4) (Fig.3, top bar). Bacterial species are scattered between groups, showing that they  
164 are not the key determinant of the clustering. Some groups are only from  $\gamma$ -proteobacteria,  
165 but others include bacteria from different classes. Groups where elements are from the  
166 same taxonomic classes tend to have either CPs or ICEs, whereas the others have mixtures  
167 of both elements. Group 4, includes many ICEs and CPs, where all ICEs have integrases while  
168 more than half of the CPs lack both replication and partition systems (Fig. 4). This group  
169 includes almost only elements from  $\epsilon$ -proteobacteria that may have specificities that we  
170 were not able to take into account. In contrast, almost all ICEs of groups 2 and 3 encode an  
171 integrase and all CPs have partition or replication systems.

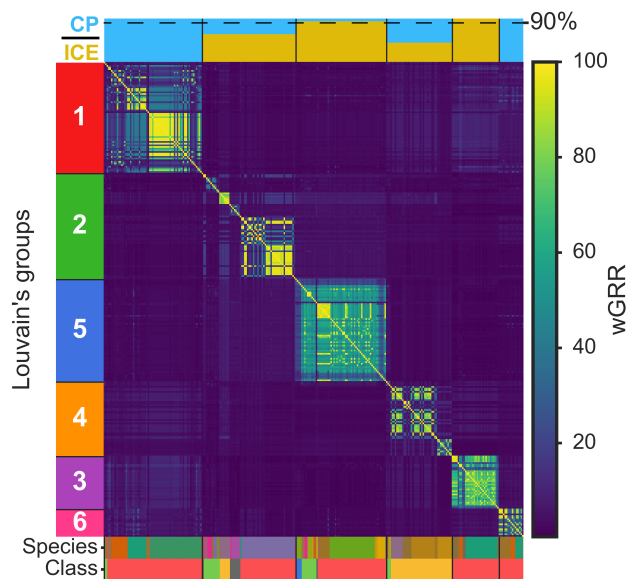

172

173 **Fig. 3:** Heatmap of the wGRR scores, ordered after the size of Louvain's group (depicted on  
174 the left bar). The top bar represents the proportion of ICEs (yellow) and CPs (blue) for each



175 group. The bottom bar assigns a color corresponding to the host's species or class ( $\gamma$ -  
176 proteobacteria in red,  $\beta$ -proteobacteria in green,  $\alpha$ -proteobacteria in blue,  $\varepsilon$ -  
177 proteobacteria in orange, Fusobacteria and Acidobacteria in grey).

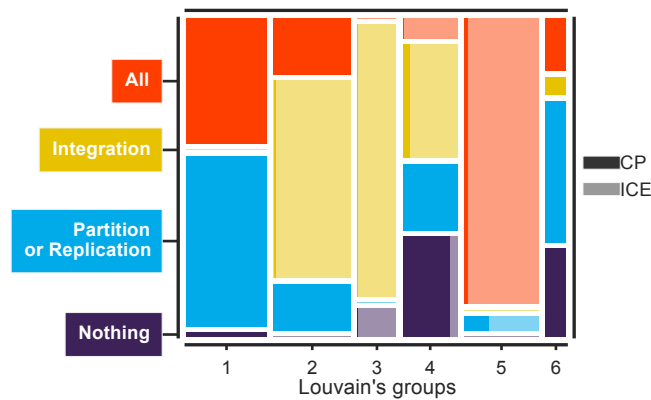

178

179 **Fig. 4:** Mosaic plot representing the frequency of key functions of conjugative elements in  
180 terms of the Louvain's groups (Fig. 3). The width of the bar is proportional to the number of  
181 elements in a given Louvain's group (see the number of elements of each group on the top  
182 of the bars) and the areas reflect the proportion of the elements with the function. The  
183 colors represent the type of function, and their tint represent the part of ICEs (lighter) and  
184 CPs (darker).

185

186 We controlled for the effect of the MPF genes in the previous clustering analysis by re-doing  
187 it without these genes (Fig. S3). This produced the same number of groups - N1 to N6 - and  
188 90% of the elements of the former groups were classed in the same novel groups (Fig. S4).  
189 The only qualitatively significant difference between the two analyses concerned the group  
190 2 for which 36% of the elements were now classed in groups N4 or N6. Overall, these  
191 controls confirm that ICEs and CPs can be grouped together, and apart from other elements  
192 of the same type. The grouping is not caused by sequence similarity between conjugative  
193 systems. Instead, it probably reflects either within group genetic exchanges between ICEs  
194 and CPs, or interconversions of the two types of elements.

195 Genetic exchanges: CPs become ICEs for broader host range

196 The clustering of ICEs and CPs could be explained by genetic transfer between them. To  
197 address this question, we searched for pairs of conjugative elements with low wGRR (<30%)

198 but some highly similar homologs (>80% sequence identity). This identified several cases of  
199 recent transfer of a single or a few genes between elements (Fig. 5A). In agreement with our  
200 observations of higher genetic plasticity in CPs, most transfers took place between these  
201 types of elements (Fig. 5.B-D).

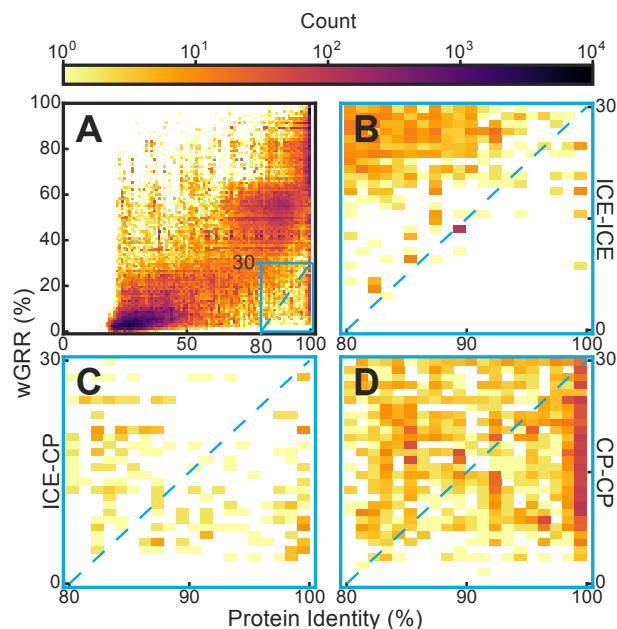

202

203 **Fig. 5:** 2D histogram of the wGRR score of pairs of conjugative elements as a function of the  
204 protein identity of their homologues. **A.** Distribution for the entire dataset. wGRR values are  
205 correlated with protein identity of the elements' homologues ( $\rho_{\text{ICE-ICE}} = 0.90$ ,  $\rho_{\text{CP-CP}} = 0.83$ ). The  
206 blue rectangle zooms on a region where the pairs of elements are very different (GRR<30%),  
207 yet they encode at least one very similar protein (identity > 80%). The dashed line separates  
208 the elements where protein identity is higher than wGRR x 2/3. **B.** Zoom for ICE-ICE  
209 comparisons. **C.** ICE-CP comparisons. **D.** CP-CP comparisons.

210

211 We hypothesized that ICEs could hold an advantage over CPs to colonize novel hosts,  
212 because replication restricts plasmid host range. To test this hypothesis, we analyzed the  
213 wGRR between pairs of ICEs and pairs of CPs in function of the phylogenetic distance  
214 between their bacterial hosts. This showed similar patterns for the two types of elements,  
215 with the notable exception that there are no pairs of highly similar plasmids (wGRR>50%) in  
216 distant hosts (more than 0.1 substitutions/position, *e.g.*, the average distance in the tree

217 between *E. coli* and *P. aeruginosa*). In contrast, a third of all ICEs ( $n=50$ ) are in these  
218 conditions (Fig. 6A, Fig. S5). The same analysis after removing the MPF genes shows wGRR  
219 values shifted to lower wGRR values for all elements, but qualitatively similar trends (Fig.  
220 S6). This suggests a major difference in the ability of ICEs and CPs to be stably maintained  
221 after their transfer into a distant host.

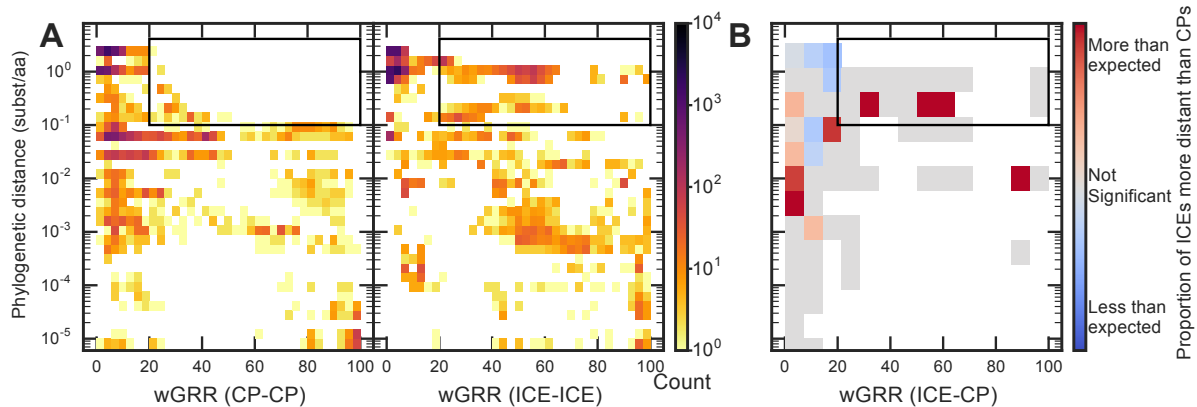

222 **Fig. 6:** wGRR as function of the host phylogenetic distance **A.** 2D histogram of the  
223 distribution of the wGRR score as a function of the phylogenetic distance for pairs of CPs  
224 (left) and pairs of ICEs (right). The bottom row corresponds to all pairs with distance lower  
225 than  $10^{-5}$  (including those in the same host). Elements in the black rectangle are depicted in  
226 a phylogenetic tree in Fig. S5. **B.** Proportion of ICEs more distinct in terms of tri-nucleotides  
227 from their host than CPs. Bins are larger than in A. to increase the power of the statistical  
228 analysis. Color code: ICEs (Red) or CPs (Blue) are more distinct from the host in terms of tri-  
229 nucleotide composition than the other element. Grey: not significant (binomial test,  $p$ -value  
230  $> 10^{-2}$ ). White: no elements in the bin.  
231

232

233 We then analyzed the pairs ICE-CP. We found few pairs of highly similar ICEs and CPs in  
234 closely related hosts (bottom right corner of Fig. 6,  $n=8$  for  $wGRR > 50\%$  and  $d < 10^{-2}$ ),  
235 suggesting that interconversion between these elements remains rare within a clade. A  
236 larger number of ICE-CP pairs were very similar but present in distant hosts ( $n=38$ , Fig. 6).  
237 The most parsimonious explanation for these observations, is the recent transfer of one of  
238 the elements (ICE or CP) to a distant bacterial host. We identified the latter element based  
239 on the differences in terms of tri-nucleotide composition between the elements and the  
240 host chromosomes (defined as  $p$ value in (31)). We then computed for each ICE-CP pair the  
241 difference between the  $p$ value of the pair ICE-host and that of the pair CP-host (see  
242 Methods). In agreement to our observation that ICEs have broader host ranges, these

243 differences indicate that ICEs are relatively more distant from the host chromosome for  
244 pairs with high wGRR in distant hosts than for the rest of the pairs (Wilcoxon rank sum test,  
245  $p\text{-value} < 10^{-20}$ , Fig. 6B, and Fig. S7). The rarity of ICE-CP pairs in closely related hosts, their  
246 abundance in distant hosts, and the identification that ICEs are the most compositionally  
247 atypical relative to the host in the latter, suggest that successful transfer of CPs to distant  
248 hosts is favored when they integrate the chromosome and become ICEs.  
249

## 250 Discussion

251 In this study, we quantified the differences between ICEs and CPs to evaluate the claims that  
252 they are essentially equivalent MGEs (15, 16, 29). We found that numerous CPs have  
253 integrases (although these may serve for dimer resolution and not integration (32)),  
254 numerous ICEs encode replication and partition functions, the elements often cluster them  
255 together, and they exchange genetic information. Furthermore, relaxases – present in both  
256 ICEs and CPs – have been shown to act as integrases or replication initiators (33). Hence,  
257 ICEs and CPs constitute closely related elements sharing many functions beyond those  
258 related to conjugation. Yet, there are also some clear differences between them (Fig. 7).  
259 First, genes encoding plasmid replicases and partition systems are more frequent in  
260 plasmids, and tyrosine and serine recombinases are more frequent in ICEs. Interestingly, we  
261 could not attribute incompatibility groups to ICEs, suggesting that the replication module is  
262 rarely exchanged between ICEs and CPs. Second, the frequency of certain accessory traits is  
263 different: plasmids are more likely to encode antibiotic resistance genes whereas ICEs  
264 encode more metabolism-related genes, even if this could result from biases in the  
265 database towards nosocomial pathogens. Finally, the %GC relative to the host, the number  
266 of repeats, the patterns of gene variation and exchange, and the host range are  
267 quantitatively different in the two types of elements. After integrating all this information,  
268 we propose that in spite of their similarities each type has specific advantages.

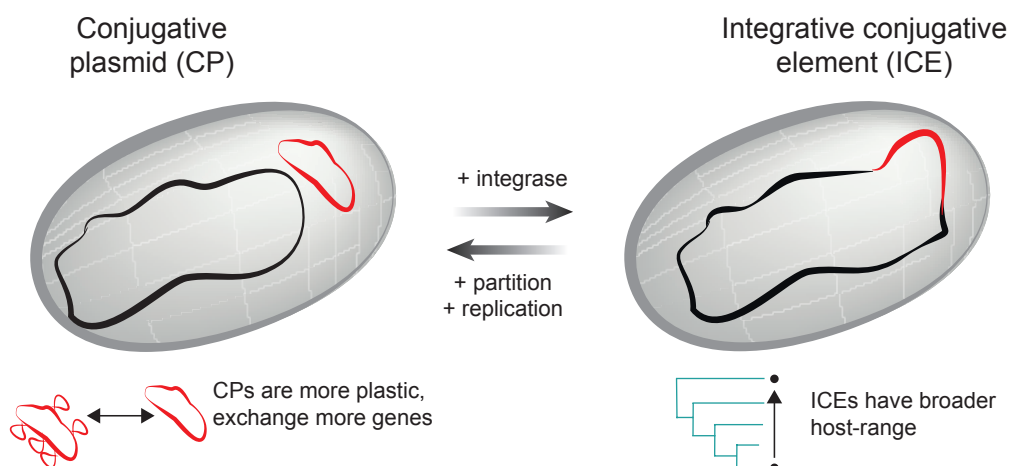

269 **Fig. 7:** To integrate or not to integrate? ICEs and CPs have similar conjugative systems but  
270 persist in different ways (resp. integrating the chromosome or replicating independently).

271 ICEs over-represent integrases, whereas plasmids over-represent replication and partition  
272 functions (although both can have all of these functions). ICEs seem at an advantage when  
273 conjugating to distant hosts, presumably because they integrate the chromosome. On the  
274 other hand, plasmids have wider distribution of size and exchange more genetic  
275 information.

276

277 Even if there are some known families of large (>200kb) ICEs (34, 35), most of these  
278 elements in our dataset have a narrower variation in size than CPs. This suggests that CPs  
279 are more flexible than ICEs in terms of the amount of genetic information they can carry and  
280 in their ability to accommodate novel information. CPs also exchange genes more  
281 frequently. Mechanistically, the rate of recombination between plasmids may be higher  
282 because they encode more repeats, integrons, and transposable elements. Plasmid copy  
283 number, when high, may also contribute to increase recombination rates. Interestingly,  
284 recombination mediated by transposable elements has been shown to drive the  
285 evolution of certain plasmids(36, 37), and to accelerate the reduction of plasmid cost thus  
286 stabilizing the element after horizontal transfer (38). The restrictions in size variation of ICEs  
287 are probably not due to the mechanism of integration or excision because such reactions  
288 occur between very distant recombination sites (39). Instead, very large ICEs may disrupt  
289 chromosome organization by affecting the distribution of motifs, changing chromosome  
290 folding domains, or unbalancing the sizes of replichores (40). Repeat-mediated  
291 recombination leads to replicon rearrangements, and may lead to stronger counter-  
292 selection of DNA repeats in ICEs than in CPs, further restricting their size variation and their  
293 flux of gene exchange. Interestingly, the size of plasmids varies much more steeply with  
294 genome size than the size of ICEs, suggesting that CPs may play a particularly important role  
295 in the evolution of large bacterial genomes of Proteobacteria, which have higher rates of  
296 genetic exchanges (41), and often contain mega-plasmids (42).

297 Some plasmids are known to be broad-host range and adapt to novel hosts, especially if  
298 they carry adaptive traits that compensate for the initially poor intrinsic persistence of the  
299 element (43, 44). However, within the large phylogenetic span considered in this work,  
300 MPF<sub>T</sub> ICEs have broader host ranges than CPs. Actually, the first known ICE, Tn916 (not

301 MPF<sub>T</sub>, thus not included in this study), became notorious due to its ability to spread  
302 antibiotic resistance between distant phyla (45).

303 Finally, we show novel evidence for interconversion between the two types of elements,  
304 which had been proposed based on the phylogeny of the conjugative system (7). This is  
305 consistent with the clustering of ICEs and CPs in terms of gene repertoires, even when  
306 removing the conjugation system from the analysis, in certain groups and not in others.  
307 Also, the transition of CPs to ICEs is the best explanation for the observations of the  
308 presence of pairs of similar elements ICE-CP in distant hosts.

309 Other traits may provide advantages to ICEs or CPs. The ability of plasmids to modify their  
310 copy number may accelerate adaptive evolutionary processes, such as the acquisition of  
311 antibiotic resistance (46). On the other hand, ICEs might be more stably maintained in  
312 lineages because they replicate within the chromosome. Finally, the carriage of ICEs and CPs  
313 may have different costs. The cost of plasmids has been extensively studied and is strongly  
314 dependent on the traits they encode (47). Much less is known about the cost of ICEs; several  
315 reports suggest that they lead to low fitness costs when conjugation is not expressed, but  
316 their fitness cost varies much more between elements during transfer (14). Direct  
317 comparisons of the cost of carriage of ICE and CPs carrying similar traits are unavailable.  
318 Further work will be needed to test these hypotheses.

319 Occasional transfers between CPs and ICEs allow them to access the other elements' gene  
320 pool. These events may create elements with traits of ICEs and of CPs, as observed in more  
321 than a third of all conjugative elements, and lead to their clustering in the wGRR group 5.  
322 Additionally, they facilitate the interconversion of one type of element into the other.

323 Many elements are mobilizable but not able to conjugate independently (42, 48). These  
324 elements often encode a relaxase that recognizes the element's origin of transfer and is able  
325 to interact with a T4SS from an autonomously conjugative element to transfer to other cells.  
326 Many of the disadvantages of conjugative plasmids and ICEs are similar to those of  
327 mobilizable plasmids and integrative mobilizable elements, whether they encode a relaxase  
328 or not. Notably, the former must be replicated in the extrachromosomal state, and the

329 latter integrate the genome where they must not disrupt genome organization. Patterns  
330 observed in conjugative elements are thus likely to be applicable to mobilizable ones.

331 These results may also be relevant to understand lysogeny by temperate phages. The vast  
332 majority of known prophages are integrated in the chromosome, but some replicate like  
333 plasmids (49, 50). Considering that prophages share some of the constraints of conjugative  
334 elements, they are likely to be under similar trade-offs. However, phages are under  
335 additional constraints. Notably, their genome size is much less variable than that of  
336 conjugative elements, because it must be packaged into the virion (51), and this may render  
337 the extrachromosomal prophages less advantageous in terms of accumulating novel genes.  
338 This could explain why most prophages are integrative whereas conjugative systems are  
339 more evenly split between integrative and extrachromosomal elements.

340



## 341 Material and Methods

### 342 Data

343 Conjugative systems of type T (MPF<sub>T</sub>) were searched in the set of complete bacterial  
344 genomes from NCBI RefSeq (<http://ftp.ncbi.nih.gov/genomes/refseq/bacteria/>, last  
345 accessed in November 2016). We analyzed 5562 complete genomes from 2268 species,  
346 including 4345 plasmids and 6001 chromosomes. The classification of the replicon in  
347 plasmid or chromosome was taken from the information available in the GenBank file. Our  
348 method to delimit ICEs is based on comparative genomics of closely related strains. Hence,  
349 we restricted our search for conjugative systems to the species for which we had at least  
350 five genomes completely sequenced (164 species, 2990 genomes).

### 351 Detection of conjugative systems and delimitation of ICEs

352 Conjugative systems were detected using the CONJscan module of MacSyFinder (52), with  
353 protein profiles and definitions of the MPF type T, published previously (53). ICEs were  
354 delimited with the same methodology, as developed in a previous work (29). Briefly, we  
355 identified the core genomes of the species. The region between two consecutive genes of  
356 the core genome defined an interval in each chromosome. We then defined spots as the  
357 sets of intervals in the chromosome flanked by genes of the same two families of the core  
358 genome (24). We then identified the intervals and the spots with conjugative systems. The  
359 information on the sets of gene families of the spots with ICEs (i.e., the spot pan-genome)  
360 was used to delimit the element boundaries (script available at  
361 [https://gitlab.pasteur.fr/gem/spot\\_ICE](https://gitlab.pasteur.fr/gem/spot_ICE)). This methodology was shown to be accurate at the  
362 gene level (precise nucleotide boundaries are not identifiable by this method, see (29)).

### 363 Functional analyses

364 Partition systems, replication systems, entry-exclusion systems and restriction modification  
365 systems were annotated with HMM profiles, as described in our previous work (29, 54).  
366 Integrases were annotated with the PFAM profile PF00589 for the Tyrosine recombinases  
367 and the combination of PFAM profiles PF00239 and PF07508 for Serine recombinases. DDE  
368 Transposases were detected with Macsyfinder (52) with models used previously (55).  
369 Antibiotic resistance genes were detected with ResFams profiles (core version v1.1) (56)

370 using the `--cut_ga` option. We determined the functional categories of genes using their  
371 annotation as provided by their best hits to the protein profiles of the EggNOG database for  
372 bacteria (version 4.5, bactNOG) (57). Genes not annotated by the EggNOG profiles were  
373 classed as “Unknown” and included in the “Poorly characterized” group. The HMM profiles  
374 were used to search the genomes with HMMER 3.1b2 (58), and we retrieved the hits with  
375 an e-value lower than  $10^{-3}$  and with alignments covering at least 50% of the profile.  
376 Integrons were detected using IntegronFinder version 1.5.1 with the `--local_max` option for  
377 higher accuracy (59). Repeats (direct and inverted) were detected with Repseek (version  
378 6.6) (60) using the option `-p 0.001` which set the p-value for determining the minimum seed  
379 length.

### 380 Statistics

381 We tested the over-representation of a given function or group of functions using Fisher's  
382 exact tests on contingency tables. For partition, replication and integration, the contingency  
383 table was made by splitting replicons in those encoding or not encoding the function and  
384 between ICEs and CPs. The use of presence/absence data instead of the absolute counts  
385 was made because the presence of at least one occurrence of a system is sufficient to have  
386 the function and because the counts were always low. For the other functions, the  
387 contingency table was made by splitting the proteins of the element in those annotated for  
388 a given function and the remaining ones. This allowed to take into account the differences in  
389 the number of genes between elements. The Fisher-exact tests were considered as  
390 significant after sequential Holm-Bonferroni correction, with a family-wise error rate of 5%  
391 (the probability of making at least one false rejection in the multiple tests, the type I error).  
392 From the contingency table, we computed the relative ratio (or relative risk) of having a  
393 given function more often in ICEs than in CPs. The relative ratio is computed as follow:  
394 
$$RR = \frac{ICE_{WF}/N_{ICE}}{CP_{WF}/N_{CP}}$$
 where  $ICE_{WF}$  is the number of ICE (or proteins in ICEs) with the given  
395 function, and  $N_{ICE}$ , the total number of ICE (or proteins in ICEs), and likewise for CP. The  
396 term  $ICE_{WF}/N_{ICE}$  is an estimation of the probability of an ICE (or a protein in an ICE) to  
397 carry a given a function.

## 398 Phylogenetic distances

399 Phylogenetic distances were extract from the Proteobacterial tree of the Core-genome. To  
400 build the tree, we identified the genes present in at least 90% of the 2897 genomes of  
401 Proteobacteria larger than 1 Mb that were available in GenBank RefSeq in November 2016.  
402 A list of orthologs was identified as reciprocal best hits using end-gap free global alignment.  
403 Hits with less than 37% similarity in amino acid sequence and more than 20% difference in  
404 protein length were discarded. We then identified the protein families with relations of  
405 orthology in at least 90% of the genomes. They represent 341 protein families. We made  
406 multiple alignments of each protein family with MAFFT v.7.205 (with default options) (61)  
407 and removed poorly aligned regions with BMGE (with default options) (62). Genes missing in  
408 a genome were replaced by stretches of "-" in each multiple alignment, which has been  
409 shown to have little impact in phylogeny reconstruction (63). The tree of the concatenate  
410 alignment was computed with FastTree version 2.1 under the LG model (64). We chose the  
411 LG model because it was the one that minimized the AIC.

## 412 Distance to the host

413 We used the differences in tri-nucleotide composition to compute the genetic distance  
414 between the mobile element and its host chromosome, as previously proposed (65). The  
415 analysis of ICEs was done by comparing the element with the chromosome after the  
416 removal of its sequence from the latter. Briefly, we computed the trinucleotide relative  
417 abundance ( $x_{ijk} \forall i, j, k \in \{A, T, C, G\}$ ) for the chromosomes (in windows of 5 kb) and for the  
418 conjugative elements (entire replicon), which is given by:  $x_{ijk} = f_{ijk} / f_i f_j f_k$ , with  $f$  the  
419 frequency of a given k-mer in the sequence (31). We first computed the Mahalanobis  
420 distance between each window and the host chromosome as follow:

$$D = \sqrt{(w - h)^T H^{-1} (w - h)}$$

421 with  $w$ , the vector of tri-nucleotide abundances ( $x_{ijk}$ ) in a given window, and  $h$ , the mean of  
422 the vector of  $x_{ijk}$  (*i.e.*, the average tri-nucleotide abundance in the chromosome).  $H$  is the  
423 covariance matrix of the tri-nucleotide relative abundances. The inverse of the covariance  
424 matrix ( $H^{-1}$ ) downweights frequent trinucleotides, like the tri-nucleotides corresponding to  
425 start codons, which are common to conjugative elements and chromosome and could bias

426 the distance. We computed the Mahalanobis distance between conjugative elements and  
427 their hosts' chromosomes (same formula as above, but  $w$  is now for a conjugative element  
428 instead of a chromosome window). We then computed the probability (p-value) that the  
429 measured distance between a conjugative element and the host's chromosome is the same  
430 as any fragment of the host's chromosome.

431 We compared ICEs and CPs in relation to their compositional distance to the host. For this,  
432 we made the null hypothesis that the proportion of ICEs having a p-value lower than CPs  
433 follows a binomial distribution whose expected proportion is that of the entire dataset (the  
434 proportion of ICEs having a p-value lower than CP), precisely:  
435  $H_0 = N(pvalue_{ICE} < pvalue_{CP})/N_{Comparisons}$ , where  $N_{Comparisons}$  is the total number of  
436 ICE-CP pairs, *i.e.*  $151 \times 136 = 20536$ .

#### 437 Network analysis of gene repertoire relatedness

438 We built a network describing the relations of homology between the elements. The nodes  
439 in the network are conjugative elements and they are linked if they share a given relation of  
440 homology. More precisely, the relationship between two elements was quantified with the  
441 weighted Gene Repertoire Relatedness score (wGRR). This score represents the number of  
442 homologous proteins between two elements, weighted by their sequence identity, as  
443 described in (29). The formula is:

$$wGRR_{A,B} = \sum_i \frac{id(A_i, B_i)}{\min(A, B)} \overset{\leftrightarrow}{iff} value(A_i, B_i) < 10^{-5}$$

444 Where  $(A_i, B_i)$  is the  $i^{th}$  pair of homologous protein between element A and element B,  
445  $id(A_i, B_i)$  is the sequence identity of their alignment,  $\min(A, B)$  is the number of proteins of  
446 the element with fewest proteins (A or B). The sequence identity was computed with blastp  
447 v.2.2.15 (default parameters)(66) and kept all bi-directional best hits with an e-value lower  
448 than  $10^{-5}$ .

449 The network was built based on the wGRR matrix. Its representation was made using the  
450 Fruchterman-Reingold force-directed algorithm as implemented in the NetworkX v1.11  
451 python library. The groups were made using the Louvain algorithm (30). We controlled for

452 the consistency of the heuristic used to assess that the group found are not form a local  
453 optimal. We performed 100 clustering, which led to the same classification in 95% of the  
454 time.

#### 455 Incompatibility typing

456 We determined the incompatibility group of replicons using the method of PlasmidFinder  
457 (67). We used BLASTN (66) to search the replicons for sequences matching the set of 116  
458 probes used by PlasmidFinder. We kept the hits with a coverage above 60% and sequence  
459 identity above 80%, as recommended by the authors. Around 3% of the elements had  
460 multiple incompatibility types attributed.

461

#### 462 Acknowledgements

463 This work was supported by an European Research Council grant [EVOMOBILOME  
464 n°281605], and a grant from the Agence National de la Recherche [MAGISBAC, ANR-14-  
465 CE10-0007]. Work in FdIC lab was supported by grants BFU2014-55534-C2-1-P and  
466 BFU2014-62190-EXP from the Spanish Ministry of Economy and Competitiveness. We  
467 thank Alan Grossman and Marie Touchon for comments and suggestions, and Aude  
468 Bernheim for providing the phylogenetic tree of proteobacteria. J.C. is a member of the  
469 'Ecole Doctorale Frontière du Vivant (FdV) – Programme Bettencourt'.

470

## 471 References

- 472 1. Frost LS, Leplae R, Summers AO, Toussaint A (2005) Mobile genetic elements: the  
473 agents of open source evolution. *Nat Rev Microbiol* 3(9):722–32.
- 474 2. Ochman H, Lawrence JG, Groisman EA (2000) Lateral gene transfer and the nature of  
475 bacterial innovation. *Nature* 405(6784):299–304.
- 476 3. Ebersbach G, Gerdes K (2005) Plasmid segregation mechanisms. *Annu Rev Genet*  
477 39:453–79.
- 478 4. Summers DK (1991) The kinetics of plasmid loss. *Trends Biotechnol* 9(8):273–278.
- 479 5. Kobayashi I (2001) Behavior of restriction-modification systems as selfish mobile  
480 elements and their impact on genome evolution. *Nucleic Acids Res* 29(18):3742–3756.
- 481 6. Dobrindt U, Hochhut B, Hentschel U, Hacker J (2004) Genomic islands in pathogenic  
482 and environmental microorganisms. *Nat Rev Microbiol* 2(5):414–24.
- 483 7. Guglielmini J, Quintais L, Garcillán-Barcia MP, de la Cruz F, Rocha EPC (2011) The  
484 repertoire of ICE in prokaryotes underscores the unity, diversity, and ubiquity of  
485 conjugation. *PLoS Genet* 7(8):e1002222.
- 486 8. Canchaya C, Proux C, Fournous G, Bruttin A, Brussow H (2003) Prophage Genomics.  
487 *Microbiol Mol Biol Rev* 67(2):238–276.
- 488 9. Lederberg J (1998) Plasmid (1952 – 1997). *Plasmid* 9:1–9.
- 489 10. Jacob F, Schaeffer P, Wollman EL (1960) Episomic Element in Bacteria. *Symp. Soc.*  
490 *Gen. Microbiol*, pp 67–91.
- 491 11. Johnson CM, Grossman AD (2015) Integrative and Conjugative Elements (ICEs): What  
492 They Do and How They Work. *Annu Rev Genet* 49(1):annurev-genet-112414-055018.
- 493 12. Bellanger X, Payot S, Leblond-bourget N, Guédon G (2014) Conjugative and  
494 mobilizable genomic islands in bacteria: evolution and diversity. *FEMS Microbiol Rev*

- 495 38:720–760.
- 496 13. Carraro N, Burrus V (2014) Biology of Three ICE Families: SXT/R391, ICEBs1, and  
497 ICESt1/ICESt3. *Microbiol Spectr* 2(6):1–20.
- 498 14. Delavat F, Miyazaki R, Carraro N, Pradervand N, van der Meer JR (2017) The hidden  
499 life of integrative and conjugative elements. *FEMS Microbiol Rev* 41(4):512–537.
- 500 15. Carraro N, Burrus V (2015) The dualistic nature of integrative and conjugative  
501 elements. *Mob Genet Elements* 5(6):98–102.
- 502 16. Lee C a, Babic A, Grossman AD (2010) Autonomous plasmid-like replication of a  
503 conjugative transposon. *Mol Microbiol* 75(2):268–79.
- 504 17. Carraro N, Poulin D, Burrus V (2015) Replication and Active Partition of Integrative  
505 and Conjugative Elements (ICEs) of the SXT/R391 Family: The Line between ICEs and  
506 Conjugative Plasmids Is Getting Thinner. *PLOS Genet* 11(6):e1005298.
- 507 18. Nunes-Düby SE, Kwon HJ, Tirumalai RS, Ellenberger T, Landy a (1998) Similarities and  
508 differences among 105 members of the Int family of site-specific recombinases.  
509 *Nucleic Acids Res* 26(2):391–406.
- 510 19. Guglielmini J, de la Cruz F, Rocha EPC (2013) Evolution of conjugation and type IV  
511 secretion systems. *Mol Biol Evol* 30(2):315–31.
- 512 20. Guiney DG (1982) Host range of conjugation and replication functions of the  
513 Escherichia coli sex plasmid Flac. Comparison with the broad host-range plasmid RK2.  
514 *J Mol Biol* 162(3):699–703.
- 515 21. Zhong Z, Helinski D, Toukdarian A (2005) Plasmid host-range: Restrictions to F  
516 replication in Pseudomonas. *Plasmid* 54(1):48–56.
- 517 22. Klümper U, et al. (2015) Broad host range plasmids can invade an unexpectedly  
518 diverse fraction of a soil bacterial community. *ISME J* 9:934–945.
- 519 23. Rocha EPC, Danchin A (2002) Base composition bias might result from competition for  
520 metabolic resources. *Trends Genet* 18(6):291–4.

- 521 24. Oliveira PH, Touchon M, Cury J, Rocha EPC (2017) The chromosomal organization of  
522 horizontal gene transfer in Bacteria. *Nat Commun* 8(841):1–10.
- 523 25. Carraro N, et al. (2016) Plasmid-like replication of a minimal streptococcal integrative  
524 and conjugative element. *Microbiol (United Kingdom)* 162(4):622–632.
- 525 26. Francia MV, Clewell DB (2002) Transfer origins in the conjugative *Enterococcus*  
526 *faecalis* plasmids pAD1 and pAM373: Identification of the pAD1 *nic* site, a specific  
527 relaxase and a possible TraG-like protein. *Mol Microbiol* 45(2):375–395.
- 528 27. César CE, Machón C, De La Cruz F, Llosa M (2006) A new domain of conjugative  
529 relaxase TrwC responsible for efficient *oriT*-specific recombination on minimal target  
530 sequences. *Mol Microbiol* 62(4):984–996.
- 531 28. Garcillán-Barcia MP, de la Cruz F (2008) Why is entry exclusion an essential feature of  
532 conjugative plasmids? *Plasmid* 60(1):1–18.
- 533 29. Cury J, Touchon M, Rocha EPC (2017) Integrative and conjugative elements and their  
534 hosts: composition, distribution and organization. *Nucleic Acids Res* (17):1–14.
- 535 30. Blondel VD, Guillaume J-L, Lambiotte R, Lefebvre E (2008) Fast unfolding of  
536 communities in large networks. *J Stat Mech*. doi:10.1088/1742-  
537 5468/2008/10/P10008.
- 538 31. Suzuki H, Yano H, Brown CJ, Top EM (2010) Predicting plasmid promiscuity based on  
539 genomic signature. *J Bacteriol* 192(22):6045–55.
- 540 32. Carnoy C, Roten C-A (2009) The *dif*/*Xer* recombination systems in proteobacteria.  
541 *PLoS One* 4(9):e6531.
- 542 33. Wawrzyniak P, Płucienniczak G, Bartosik D (2017) The Different Faces of Rolling-Circle  
543 Replication and Its Multifunctional Initiator Proteins. *Front Microbiol* 8(November):1–  
544 13.
- 545 34. Sullivan JT, Ronson CW (1998) Evolution of rhizobia by acquisition of a 500-kb  
546 symbiosis island that integrates into a *phe-tRNA* gene. *Proc Natl Acad Sci*



- 547 95(April):5145–5149.
- 548 35. Kers JA, et al. (2005) A large, mobile pathogenicity island confers plant pathogenicity  
549 on *Streptomyces* species. *Mol Microbiol* 55(4):1025–1033.
- 550 36. Hall JPJ, Williams D, Paterson S, Harrison E, Brockhurst MA (2017) Positive selection  
551 inhibits gene mobilization and transfer in soil bacterial communities. *Nat Ecol Evol*  
552 1(9):1348–1353.
- 553 37. He S, et al. (2016) Mechanisms of Evolution in High-Consequence Drug Resistance.  
554 *MBio* 7(6):e01987-16.
- 555 38. Porse A, Schønning K, Munck C, Sommer MOA (2016) Survival and Evolution of a  
556 Large Multidrug Resistance Plasmid in New Clinical Bacterial Hosts. *Mol Biol Evol*  
557 33(11):2860–2873.
- 558 39. Wu LJ, Errington J, Rossignol M, Cornet F, Bocard F (2002) A large dispersed  
559 chromosomal region required for chromosome segregation in sporulating cells of  
560 *Bacillus subtilis*. *EMBO J* 21(15):4001–11.
- 561 40. Touchon M, Rocha EPC (2016) Coevolution of the organization and structure of  
562 prokaryotic genomes. *Cold Spring Harb Perspect Biol* 8(1):1–18.
- 563 41. Oliveira PH, Touchon M, Rocha EPC (2016) Regulation of genetic flux between  
564 bacteria by restriction-modification systems. *Proc Natl Acad Sci U S A* 113(20):5658–  
565 63.
- 566 42. Smillie C, Garcillán-Barcia MP, Francia MV, Rocha EPC, de la Cruz F (2010) Mobility of  
567 plasmids. *Microbiol Mol Biol Rev* 74(3):434–52.
- 568 43. De Gelder L, Williams JJ, Ponciano JM, Sota M, Top EM (2008) Adaptive plasmid  
569 evolution results in host-range expansion of a broad-host-range plasmid. *Genetics*  
570 178(4):2179–2190.
- 571 44. Loftie-Eaton W, et al. (2017) Compensatory mutations improve general  
572 permissiveness to antibiotic resistance plasmids. *Nat Ecol Evol* 1:1354–1363.

- 573 45. Clewell DB, Flannagan SE, Jaworski DD (1995) Unconstrained bacterial promiscuity:  
574 the Tn916–Tn1545 family of conjugative transposons. *Trends Microbiol* 3(6):229–236.
- 575 46. San Millan A, Escudero JA, Gifford DR, Mazel D, Maclean RC (2016) Multicopy  
576 plasmids potentiate the evolution of antibiotic resistance in bacteria. *Nat Ecol Evol*  
577 1(10):1–8.
- 578 47. San Millan A, MacLean RC (2017) Fitness Costs of Plasmids: a Limit to Plasmid  
579 Transmission. *Microbiol Spectr* 5(5):1–12.
- 580 48. Guédon G, Libante V, Coluzzi C, Payot S, Leblond-Bourget N (2017) The obscure world  
581 of integrative and mobilizable elements, highly widespread elements that pirate  
582 bacterial conjugative systems. *Genes (Basel)* 8(11). doi:10.3390/genes8110337.
- 583 49. Ravin N V. (2011) N15: The linear phage-plasmid. *Plasmid* 65(2):102–109.
- 584 50. Łobocka MB, et al. (2004) Genome of Bacteriophage P1. *J Bacteriol* 186(21):7032–  
585 7068.
- 586 51. Touchon M, Moura de Sousa JA, Rocha EP (2017) Embracing the enemy: The  
587 diversification of microbial gene repertoires by phage-mediated horizontal gene  
588 transfer. *Curr Opin Microbiol* 38:66–73.
- 589 52. Abby SS, Néron B, Ménager H, Touchon M, Rocha EPC (2014) MacSyFinder: A  
590 Program to Mine Genomes for Molecular Systems with an Application to CRISPR-Cas  
591 Systems. *PLoS One* 9(10):e110726.
- 592 53. Guglielmini J, et al. (2014) Key components of the eight classes of type IV secretion  
593 systems involved in bacterial conjugation or protein secretion. *Nucleic Acids*  
594 *Res*:gku194-.
- 595 54. Oliveira PH, Touchon M, Rocha EPC (2014) The interplay of restriction-modification  
596 systems with mobile genetic elements and their prokaryotic hosts. *Nucleic Acids Res*  
597 42(21):1–14.
- 598 55. Touchon M, et al. (2014) The Genomic Diversification of the Whole *Acinetobacter*

- 599 Genus: Origins, Mechanisms, and Consequences. *Genome Biol Evol* 6(10):2866–2882.
- 600 56. Gibson MK, Forsberg KJ, Dantas G (2014) Improved annotation of antibiotic resistance  
601 determinants reveals microbial resistomes cluster by ecology. *ISME J* 9(1):207–216.
- 602 57. Huerta-Cepas J, et al. (2016) eggNOG 4.5: a hierarchical orthology framework with  
603 improved functional annotations for eukaryotic, prokaryotic and viral sequences.  
604 *Nucleic Acids Res* 44(D1):D286-93.
- 605 58. Eddy SR (2011) Accelerated Profile HMM Searches. *PLoS Comput Biol* 7(10):e1002195.
- 606 59. Cury J, Jové T, Touchon M, Néron B, Rocha EP (2016) Identification and analysis of  
607 integrons and cassette arrays in bacterial genomes. *Nucleic Acids Res* 44(10):4539–50.
- 608 60. Achaz G, Boyer F, Rocha EPC, Viari A, Coissac E (2007) Repseek, a tool to retrieve  
609 approximate repeats from large DNA sequences. *Bioinformatics* 23(1):119–121.
- 610 61. Katoh K, Standley DM (2013) MAFFT multiple sequence alignment software version 7:  
611 Improvements in performance and usability. *Mol Biol Evol* 30(4):772–780.
- 612 62. Criscuolo A, Gribaldo S (2010) BMGE (Block Mapping and Gathering with Entropy): a  
613 new software for selection of phylogenetic informative regions from multiple  
614 sequence alignments. *BMC Evol Biol* 10:210.
- 615 63. Filipinski A, Murillo O, Freydenzon A, Tamura K, Kumar S (2014) Prospects for building  
616 large timetrees using molecular data with incomplete gene coverage among species.  
617 *Mol Biol Evol* 31(9):2542–2550.
- 618 64. Price MN, Dehal PS, Arkin AP (2009) Fasttree: Computing large minimum evolution  
619 trees with profiles instead of a distance matrix. *Mol Biol Evol* 26(7):1641–1650.
- 620 65. Suzuki H, Sota M, Brown CJ, Top EM (2008) Using Mahalanobis distance to compare  
621 genomic signatures between bacterial plasmids and chromosomes. *Nucleic Acids Res*  
622 36(22):e147.
- 623 66. Altschul SF, et al. (1997) Gapped BLAST and PSI-BLAST: A new generation of protein  
624 database search programs. *Nucleic Acids Res* 25(17):3389–3402.

625 67. Carattoli A, et al. (2014) In Silico detection and typing of plasmids using plasmidfinder  
626 and plasmid multilocus sequence typing. *Antimicrob Agents Chemother* 58(7):3895–  
627 3903.

628

629
